# Supplementary material for: On-chip laser-induced DNA dehybridization
Source: Royal Society of Chemistry journal article supplement (doi:10.1039/c3an00288h), 2013-01-01
Supplement: c3an00288h.pdf [file c3an00288h.pdf]

## Supplemental Material

| Template | Sequence 5'-3'                                                                                                                                                                                                                        | Length (bp) |
|----------|---------------------------------------------------------------------------------------------------------------------------------------------------------------------------------------------------------------------------------------|-------------|
| SARS     | CGTTTTTAAACGGGTTTGCGGTGTAAGTGCAGCCCGTCTTACACCGTGCG<br>GCACAGGCACTAGTACTGATGTCGTCTACAGGGCTTTTGATATTTACAAC<br>GAAAAAGTTGCTGGTTTTGCAAAGTTCCTAAAACTAATTGCTGTCGCT<br>TCCAGGAGAAGGATGAGGAAGGCAATTTATTAGACTCTTACTTT                          | 193         |
| Rhino    | AACCTATTACACTTGAGGACAGTGTCTTTGGCACTGATGGATTAGAGGC<br>TCTTGATTTGAACACTAGCGCAGGATTTCCATATATTGCAATGGGAGTT<br>AAAAAGAGAGATTTAATAAACAACAAGACCAAGGATATAAGCAAATTA<br>AAGAAGCAATTGACAAATACGGAGTTGACTTACCTATGGTCACCTTCTT<br>GAAAGATGAACTCAGAAA | 214         |

Table 1: Template fragment sequences

| Primer          | SARS                                                    | Rhino                                                  |
|-----------------|---------------------------------------------------------|--------------------------------------------------------|
| Forward (5'-3') | TGCCTTCCTCATCCTTCTCC                                    | AACACTAGCGCAGGATTTCCA                                  |
| Reverse (5'-3') | TGATGTCGTCTACAGGGCTTTT                                  | CATCTTTCAAGAAGGTGACCATAGG                              |
| Probe           | /56-<br>fam/AACGAAAAAGTTGCTGGTTTT<br>GCAAAGTTCC/3BHQ_1/ | /56-<br>fam/AAACAACAAGACCAAGGATATAAGC<br>AACTT/3BHQ_1/ |

Table 2: Primer and probe sequences

| Oligo | Sequence 5'-3'                                                        | Length (bp) |
|-------|-----------------------------------------------------------------------|-------------|
| SARS  | CCCTGTAGACGACATCAGTACTAGTGCCTGTGCCGCACGGTGTAAGACGG<br>GCTGCACTTACA    | 62          |
| Rhino | TGGAAATCCTGCGCTAGTGTTCAAATCAAGAGCCTCTAATCCATCAGTGC<br>CAAAGACACTGTCCT | 65          |

Table 3: Oligo sequences synthesized on microarray
